# Supplementary material for: Aerobic oxidation-functionalization of the aryl moiety in van Koten's pincer complex (NCN)Ni(ii)Br: relevance to carbon–heteroatom coupling reactions promoted by high-valent nickel species
Source: Royal Society of Chemistry journal article supplement (doi:10.1039/d1nj05162h), 2021-12-30
Supplement: d1nj05162h1.pdf [file d1nj05162h1.pdf]

**Electronic Supporting Information For :**

**Aerobic Oxidation-Functionalization of the aryl moiety in  
van Koten's Pincer Complex (NCN)Ni<sup>II</sup>Br:**

**Relevance to Carbon-HeBrteroatom Coupling Reactions  
Promoted by High-Valent Nickel Species**

*Jean-Philippe Cloutier, Fahimeh Zamani, and Davit Zargarian\**

Département de chimie, Université de Montréal, Montréal (Québec), Canada H3C 3J7

[zargarian.davit@umontreal.ca](mailto:zargarian.davit@umontreal.ca)

## Table of contents

|                                                                                                                              |         |
|------------------------------------------------------------------------------------------------------------------------------|---------|
| <b>Figure S1-S12.</b> $^1\text{H}$ NMR data for the functionalization of $(\text{NCN})\text{Ni}(\text{II})\text{Br}$ .....   | pp 2-13 |
| <b>Figure S13.</b> $^1\text{H}$ NMR data of complex $(\text{NCN})\text{Ni}(\text{II})(\text{OSiMe}_3)$ .....                 | p. 14   |
| <b>Figure S14.</b> $^{13}\text{C}$ NMR data of complex $(\text{NCN})\text{Ni}(\text{II})(\text{OSiMe}_3)$ .....              | p. 15   |
| <b>Table 1.</b> Crystallographic data and collection parameters for $(\text{NCN})\text{Ni}(\text{II})(\text{OSiMe}_3)$ ..... | p 16    |
| <b>Footnotes</b> .....                                                                                                       | p. 17   |

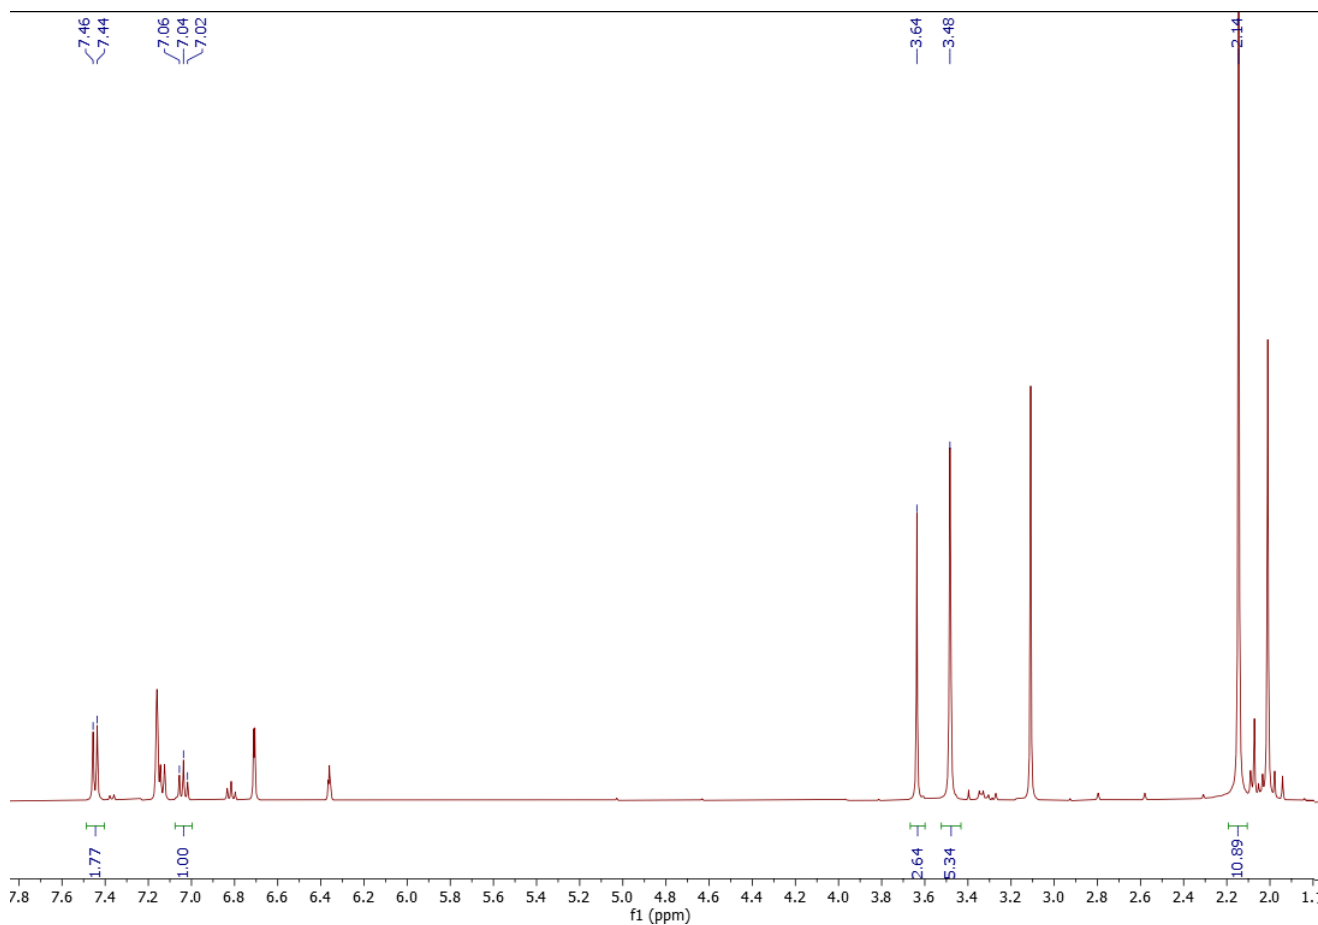

**Figure S1.** Reaction of  $(\text{NCN})\text{Ni}^{\text{II}}\text{Br}$  with MeOH in air at reflux.  $^1\text{H}$  NMR  $\text{C}_6\text{D}_6$ ,  $\delta$  7.45 (2H, d,  $J_{\text{HH}} = 7.6$ ),  $\delta$  7.04 (1H, t,  $J_{\text{HH}} = 7.6$ ),  $\delta$  3.64 (3H, s),  $\delta$  3.49 (4H, s),  $\delta$  2.16 (12H, s).

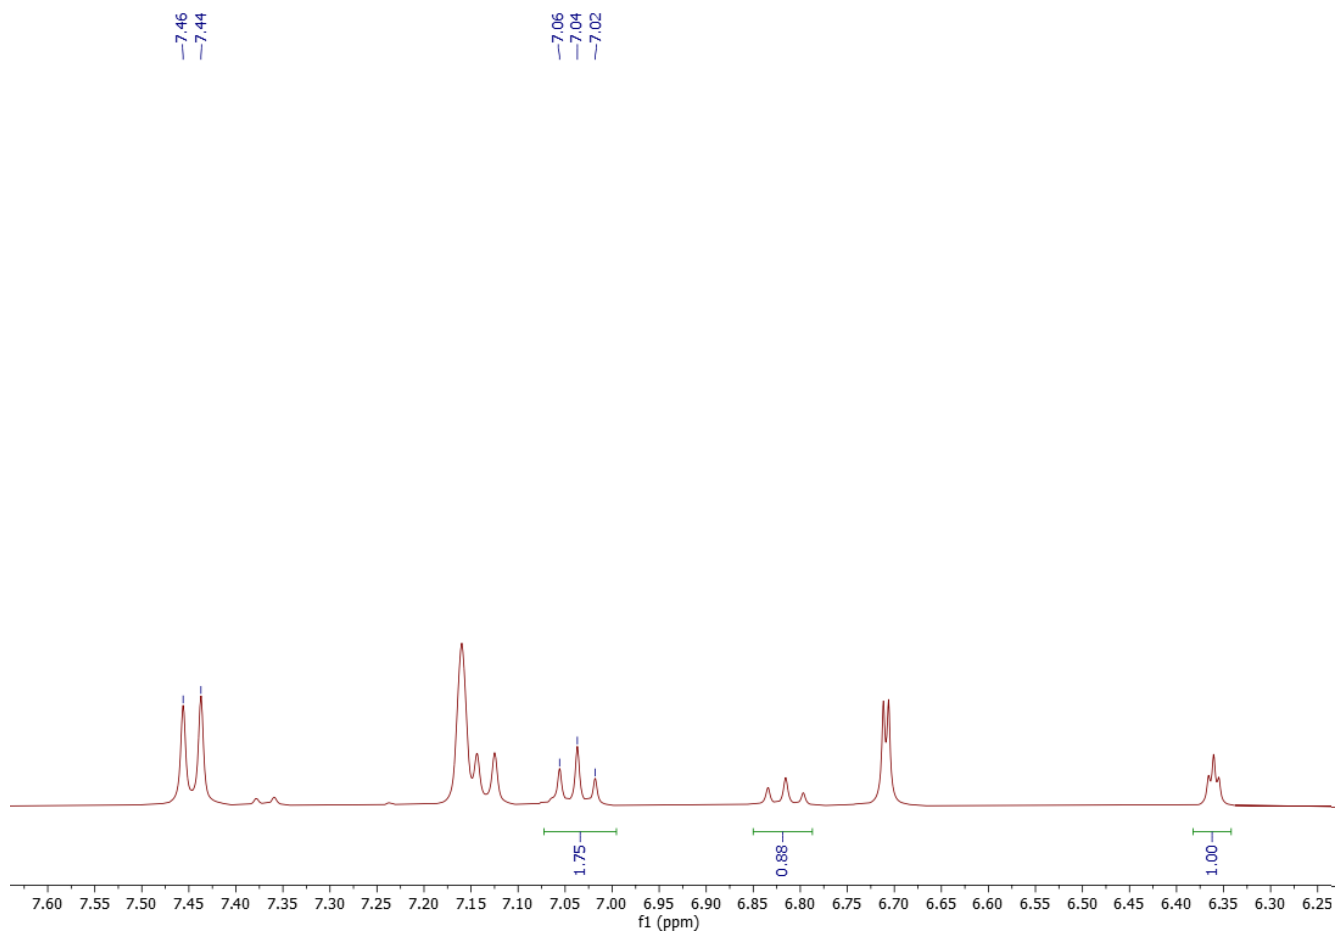

**Figure S2.**  $^1\text{H}$  NMR spectrum for the reaction of  $(\text{NCN})\text{Ni}^{\text{II}}\text{Br}$  with MeOH in air at reflux with internal standard integrated to 1.00 ( $\text{C}_6\text{D}_6$ ).  $\text{NC}(\text{OMe})\text{N}$  major product.

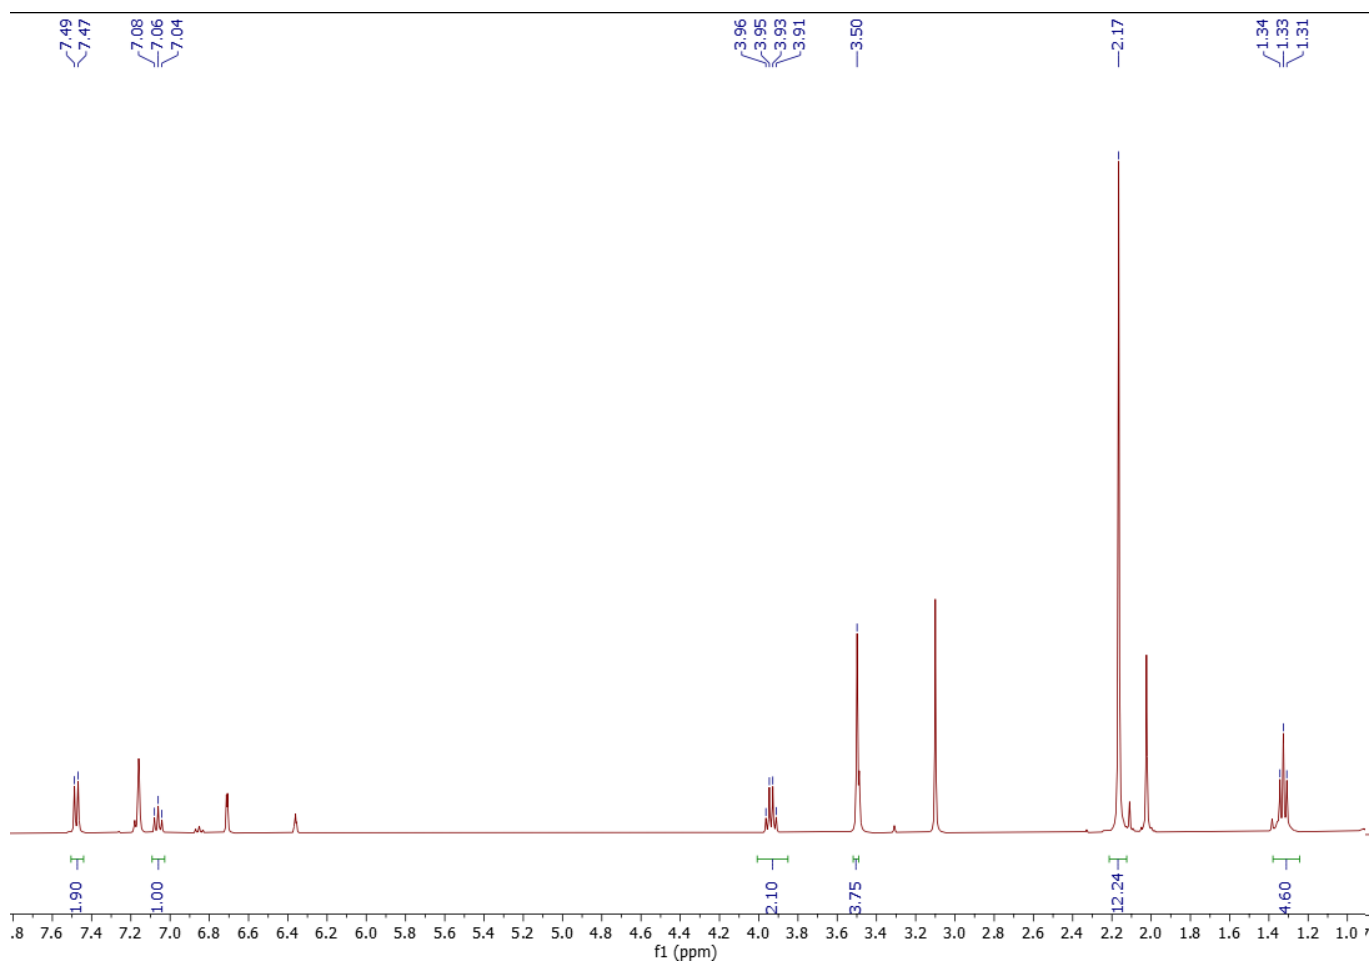

**Figure S3.** Reaction of  $(\text{NCN})\text{Ni}^{\text{II}}\text{Br}$  with refluxing EtOH in air.  $^1\text{H}$  NMR  $\text{C}_6\text{D}_6$ ,  $\delta$  7.48 (2H, d,  $J_{\text{HH}} = 7.6$ ),  $\delta$  7.06 (1H, t,  $J_{\text{HH}} = 7.6$ ),  $\delta$  3.94 (2H, q,  $J_{\text{HH}} = 7.0$ ),  $\delta$  3.50 (4H, s),  $\delta$  2.17 (12H, s),  $\delta$  1.33 (3H, t,  $J_{\text{HH}} = 7.0$ ).

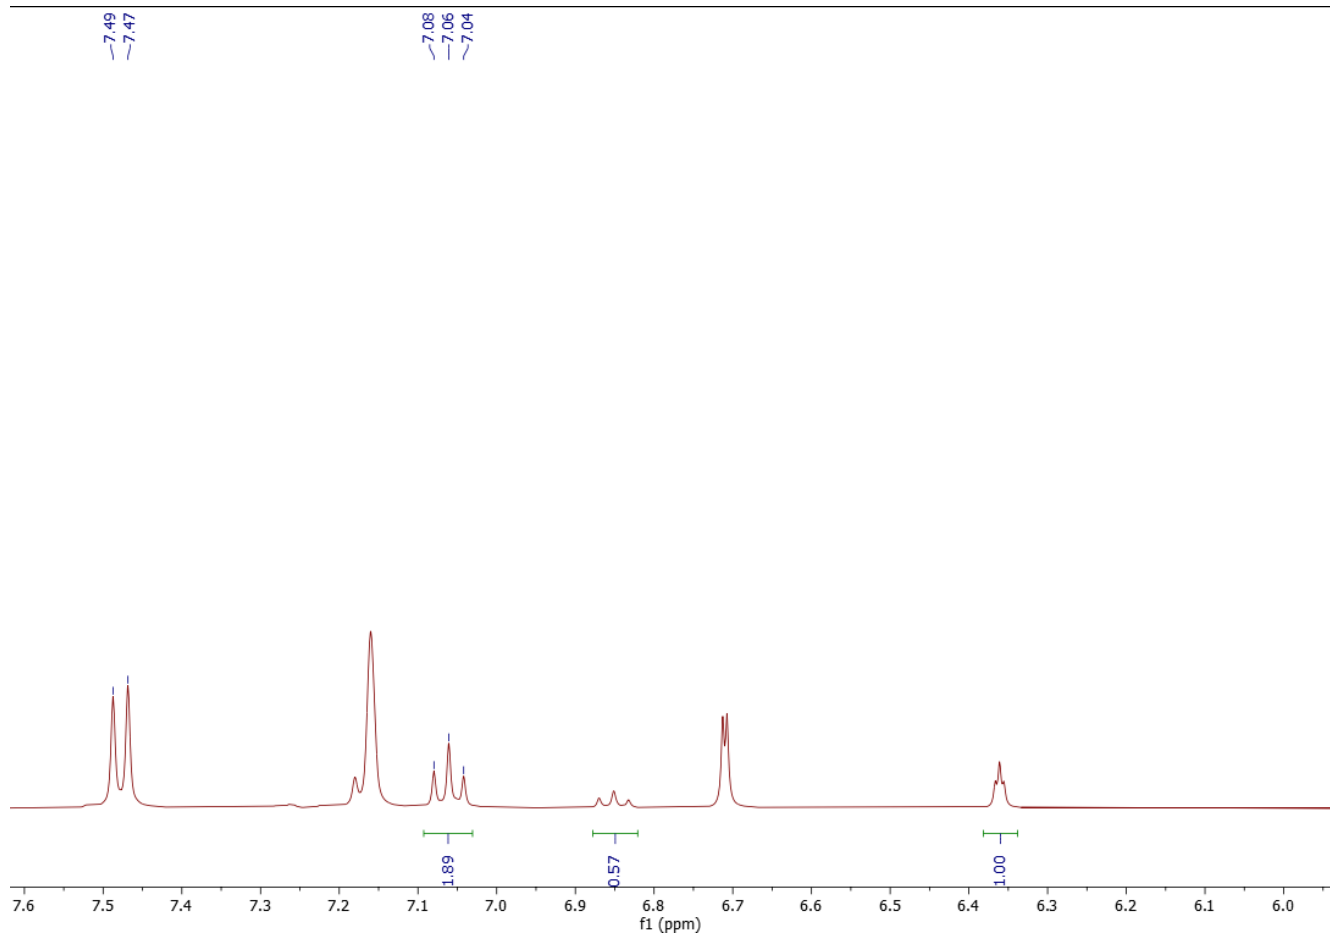

**Figure S4.** <sup>1</sup>H NMR spectrum of reaction of (NCN)Ni<sup>II</sup>Br with EtOH in air with internal standard in C<sub>6</sub>D<sub>6</sub> (integrated to 1.00). NC(OEt)N major product and NC(OH)N minor product.

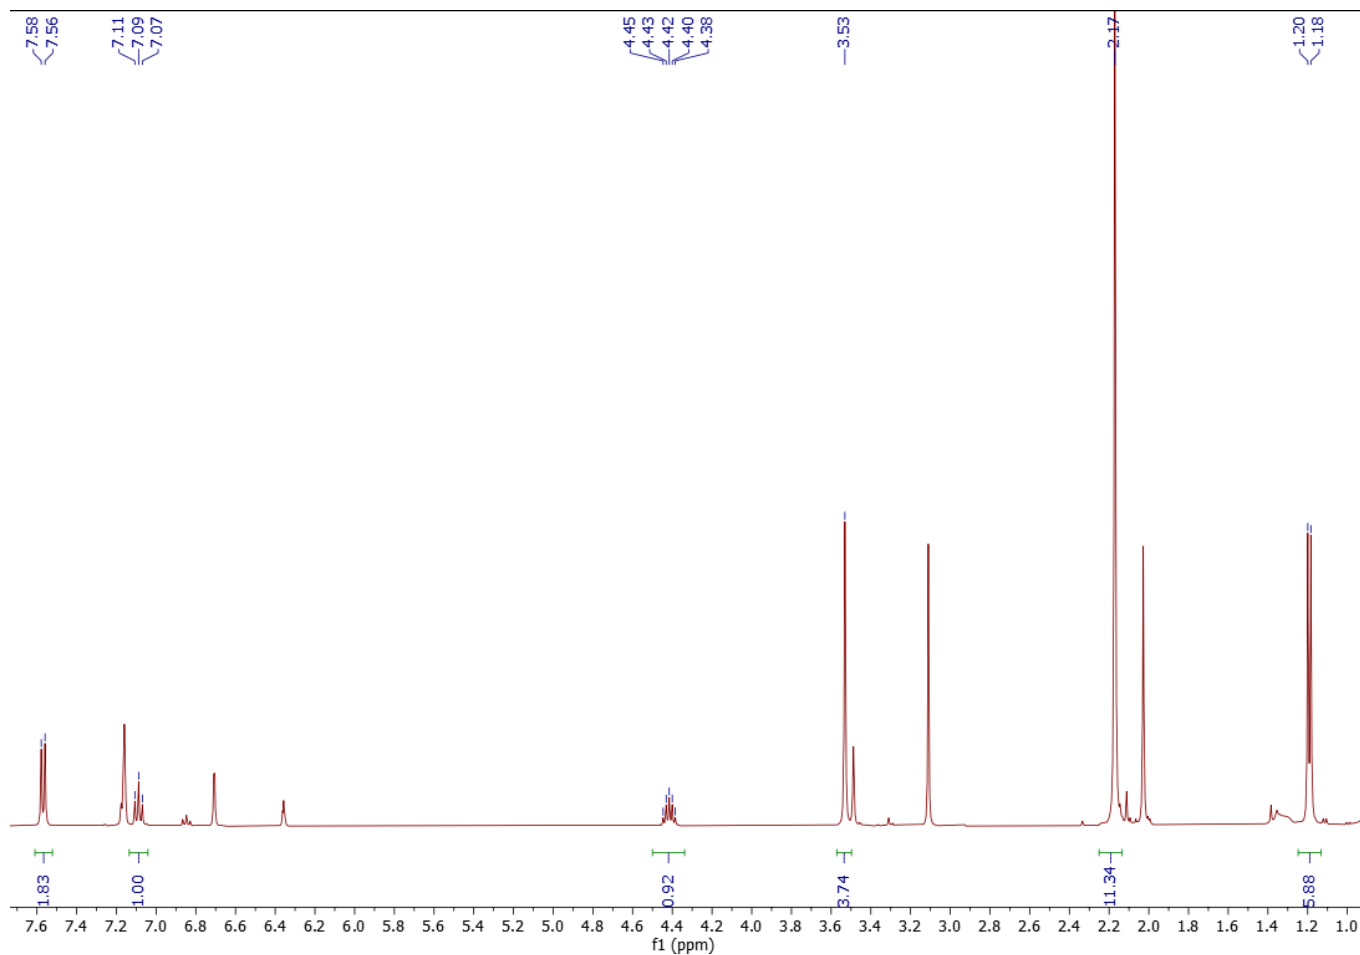

**Figure S5.** Reaction of  $(\text{NCN})\text{Ni}^{\text{II}}\text{Br}$  with *i*-PrOH in air at reflux.  $^1\text{H}$  NMR  $\text{C}_6\text{D}_6$ ,  $\delta$  7.57 (2H, d,  $J_{\text{HH}} = 7.6$ ),  $\delta$  7.09 (1H, t,  $J_{\text{HH}} = 7.6$ ),  $\delta$  4.42 (1H, sept,  $J_{\text{HH}} = 6.1$ ),  $\delta$  3.53 (4H, s),  $\delta$  2.17 (12H, s),  $\delta$  1.9 (6H, d,  $J_{\text{HH}} = 6.1$ ).

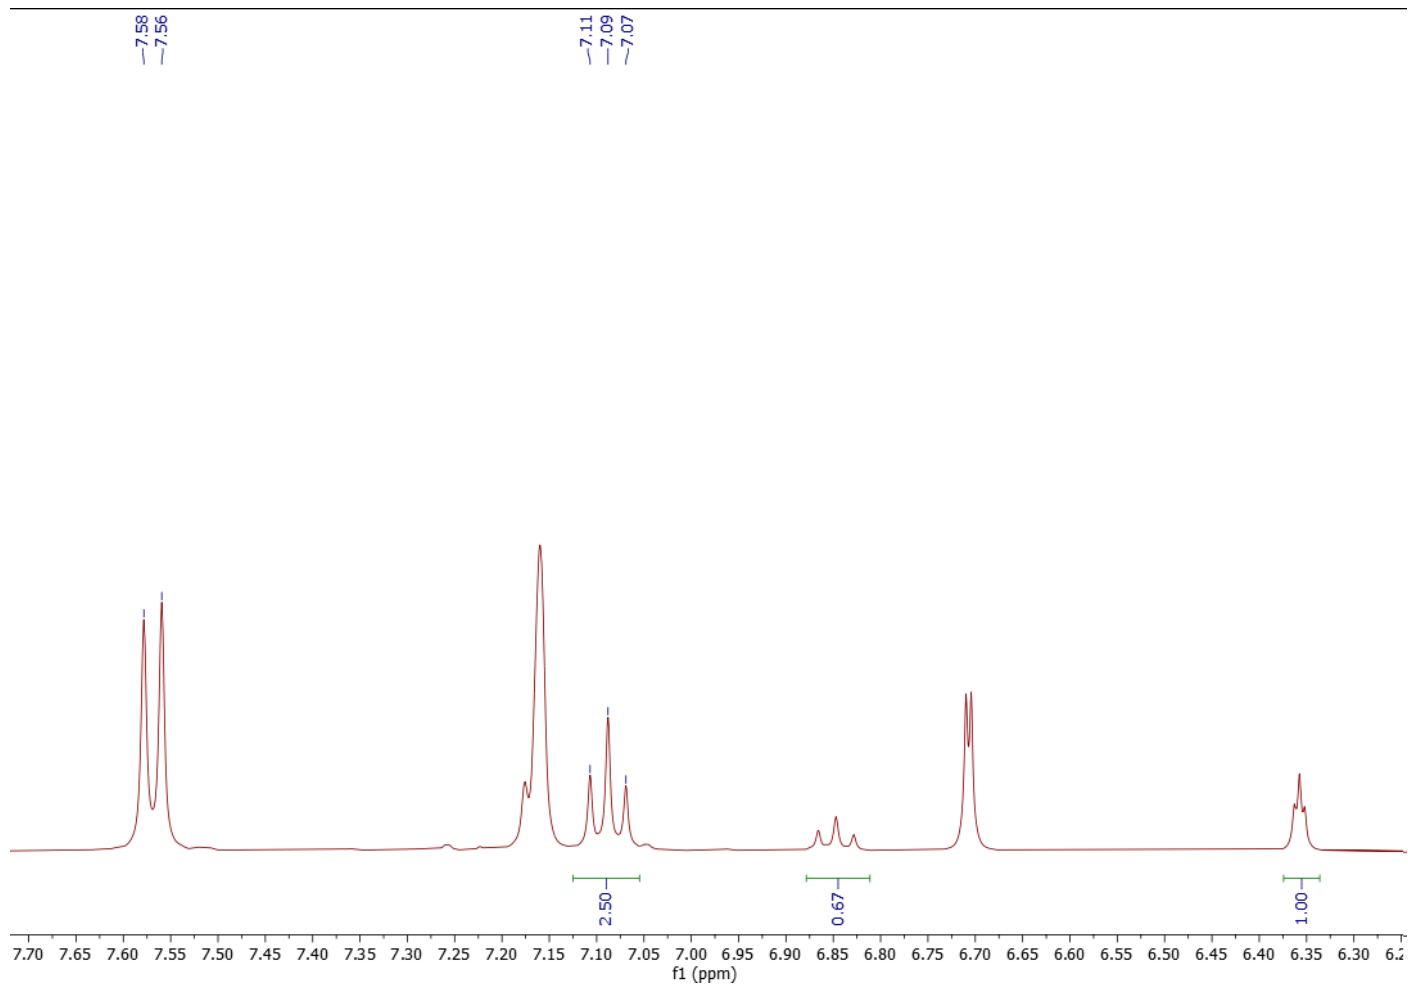

**Figure S6.** <sup>1</sup>H NMR spectrum of reaction of (NCN)Ni<sup>II</sup>Br with *i*-PrOH in air with internal standard in C<sub>6</sub>D<sub>6</sub> (integrated to 1.00). NC(O-*i*-Pr)N major product and NC(OH)N minor product.

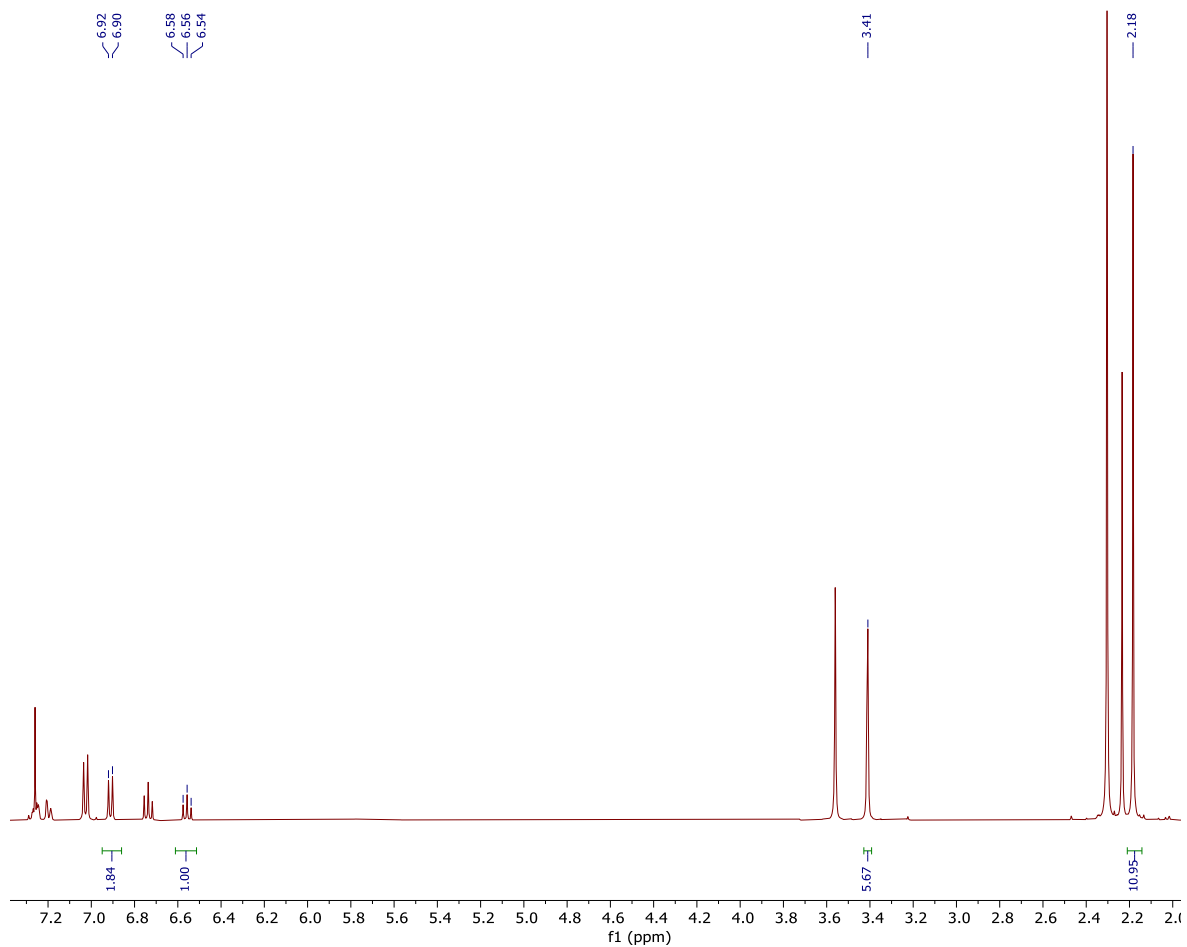

**Figure S7.** Reaction of  $(\text{NCN})\text{Ni}^{\text{III}}\text{Br}$  with  $\text{NH}_4\text{OH}$  in air.  $^1\text{H}$  NMR  $\text{C}_6\text{D}_6$ ,  $\delta$  6.91 (2H, d,  $J_{\text{HH}} = 7.4$ ),  $\delta$  6.56 (1H, t,  $J_{\text{HH}} = 7.4$ ),  $\delta$  3.41 (4H, s),  $\delta$  3.53 (4H, s),  $\delta$  2.18 (12H, s).



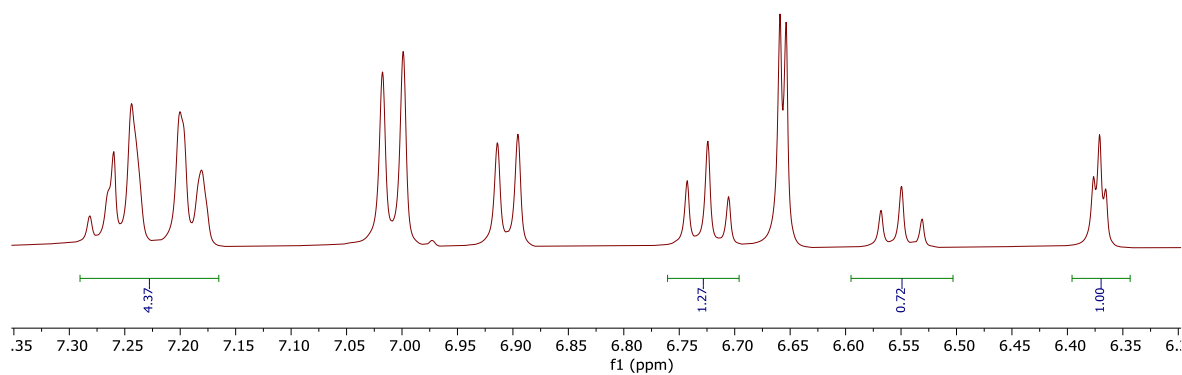

**Figure S8.** <sup>1</sup>H NMR spectrum of reaction of (NCN)Ni<sup>II</sup>Br with aqueous NH<sub>4</sub>OH in air with internal standard in C<sub>6</sub>D<sub>6</sub> (integrated to 1.00). NC(NH<sub>2</sub>)N minor product, NC(OH)N and proligand major products.

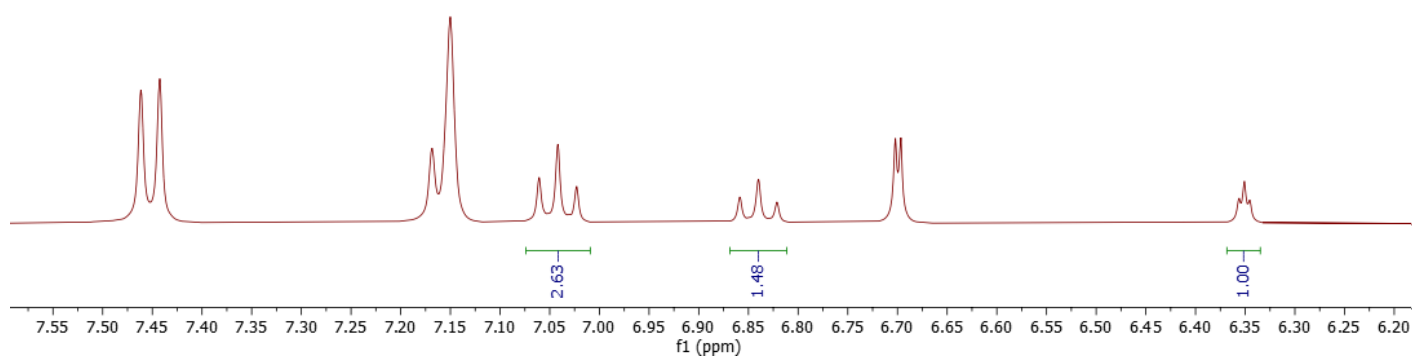

**Figure S9.** <sup>1</sup>H NMR spectrum of reaction of (NCN)Ni<sup>II</sup>Br with MeOH under O<sub>2</sub> with internal standard in C<sub>6</sub>D<sub>6</sub> (integrated to 1.00). NC(OMe)N major product and NC(OH)N minor product.

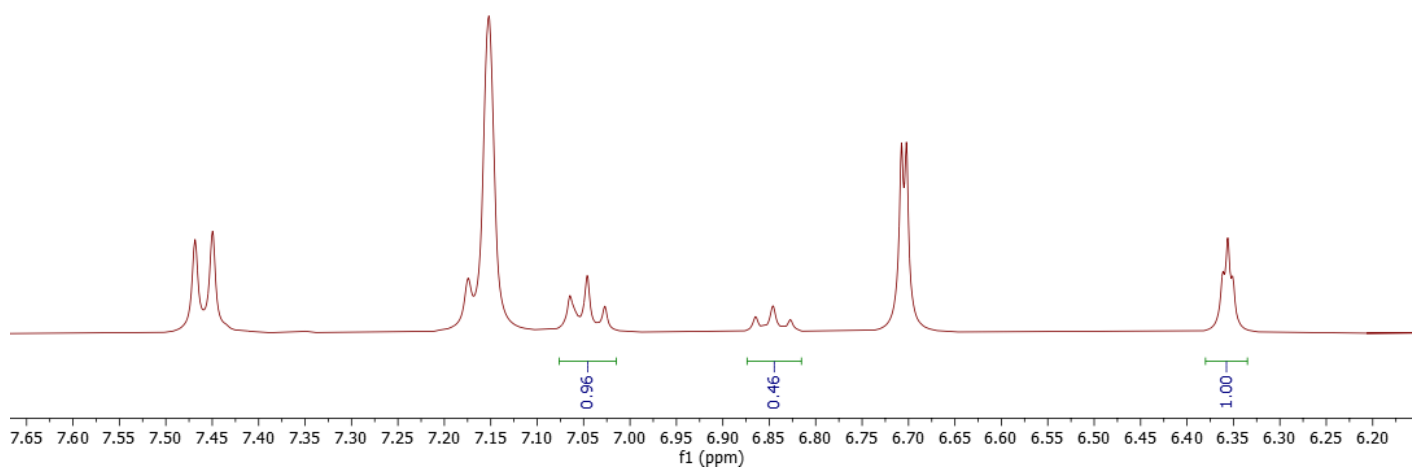

**Figure S10.**  $^1\text{H}$  NMR spectrum of reaction of  $(\text{NCN})\text{Ni}^{\text{II}}\text{Br}$  with MeOH under  $\text{O}_2$  with internal standard in  $\text{C}_6\text{D}_6$  (integrated to 1.00).  $\text{NC}(\text{OMe})\text{N}$  major product and  $\text{NC}(\text{OH})\text{N}$  minor product.

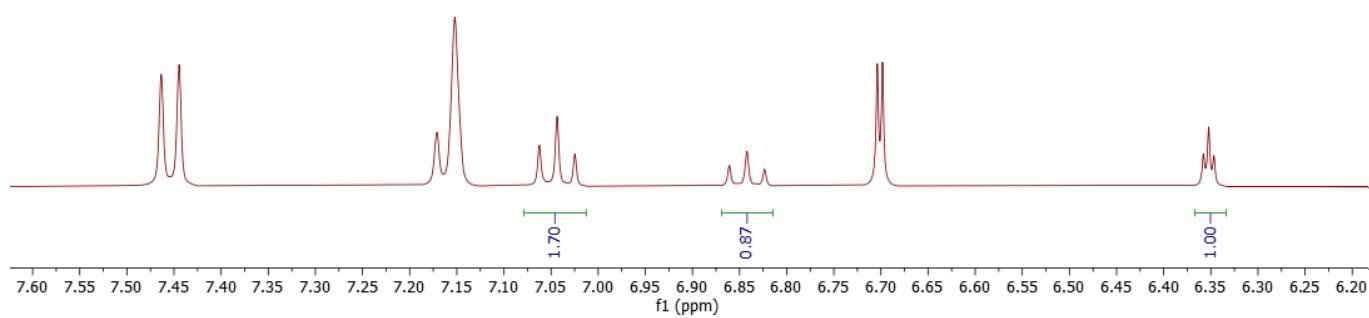

**Figure S11.** <sup>1</sup>H NMR spectrum of reaction of (NCN)Ni<sup>II</sup>Br with MeOH in air with NEt<sub>3</sub> with internal standard in C<sub>6</sub>D<sub>6</sub> (integrated to 1.00). NC(OMe)N major product and NC(OH)N minor product.

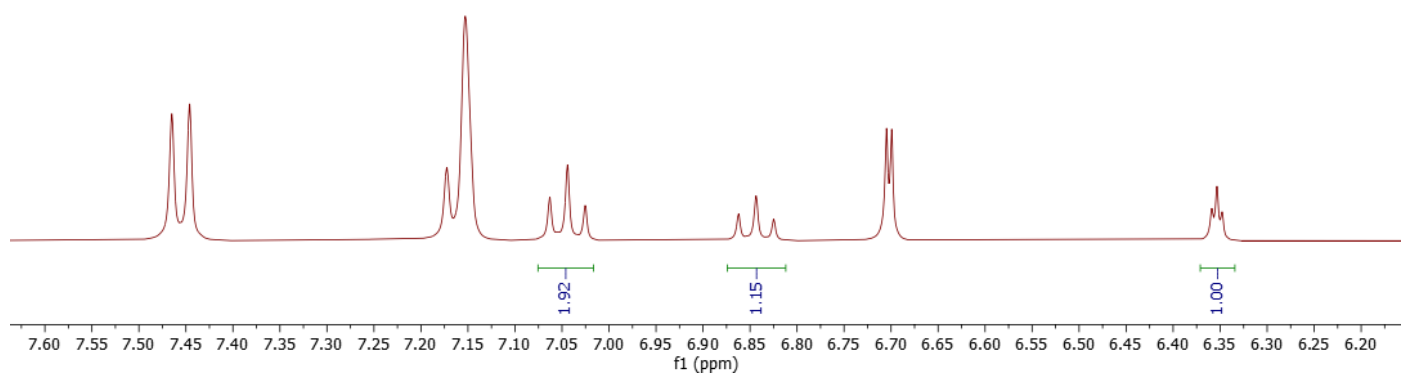

**Figure S12.** <sup>1</sup>H NMR spectrum of reaction of (NCN)Ni<sup>II</sup>Br with MeOH under O<sub>2</sub> with NEt<sub>3</sub> with internal standard in C<sub>6</sub>D<sub>6</sub> (integrated to 1.00). NC(OMe)N major product and NC(OH)N minor product.

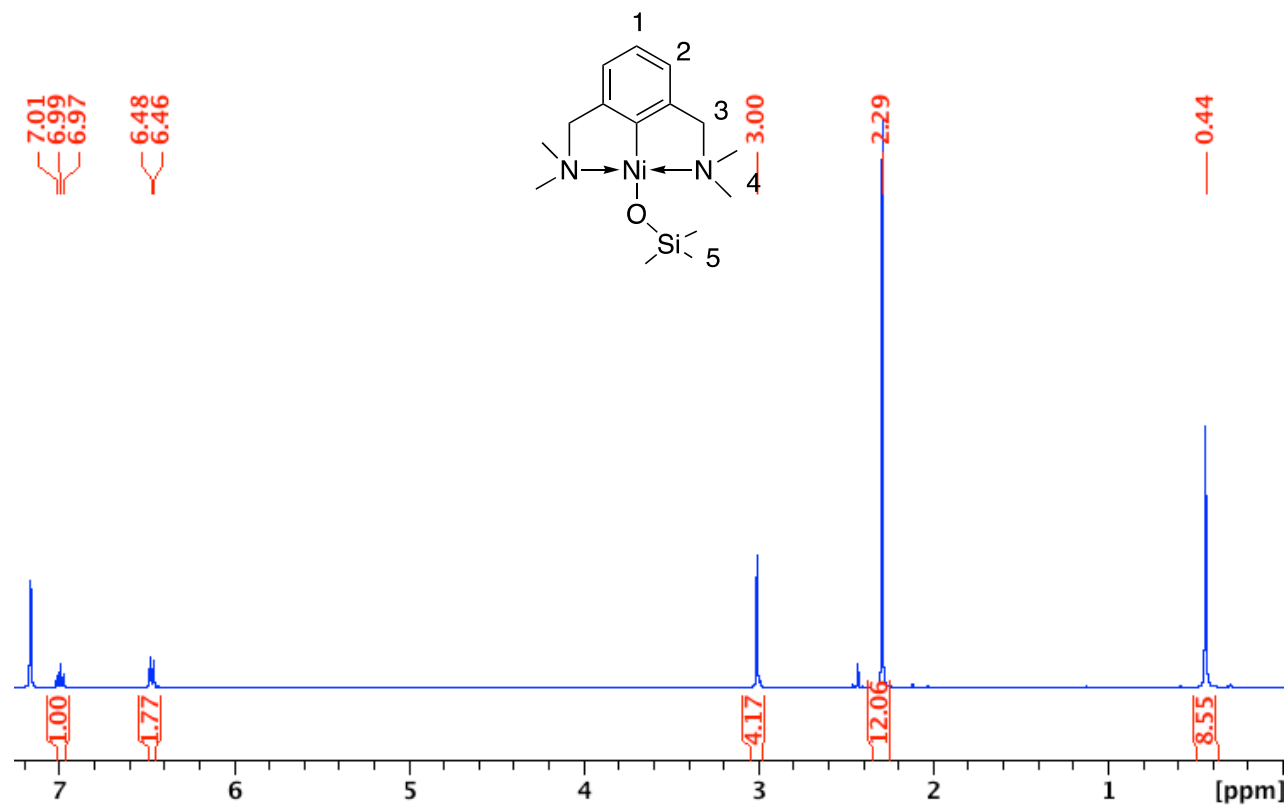

**Figure S13.** <sup>1</sup>H NMR C<sub>6</sub>D<sub>6</sub>, δ 6.99 (1H, t,  $J_{HH} = 7.4$ , H<sub>1</sub>), δ 6.47 (2H, d,  $J_{HH} = 7.4$ , H<sub>2</sub>), δ 3.00 (4H, s, H<sub>3</sub>), δ 2.29 (12H, s, H<sub>4</sub>), δ 0.440 (9H, s, H<sub>5</sub>)

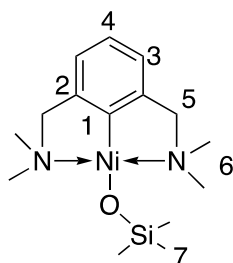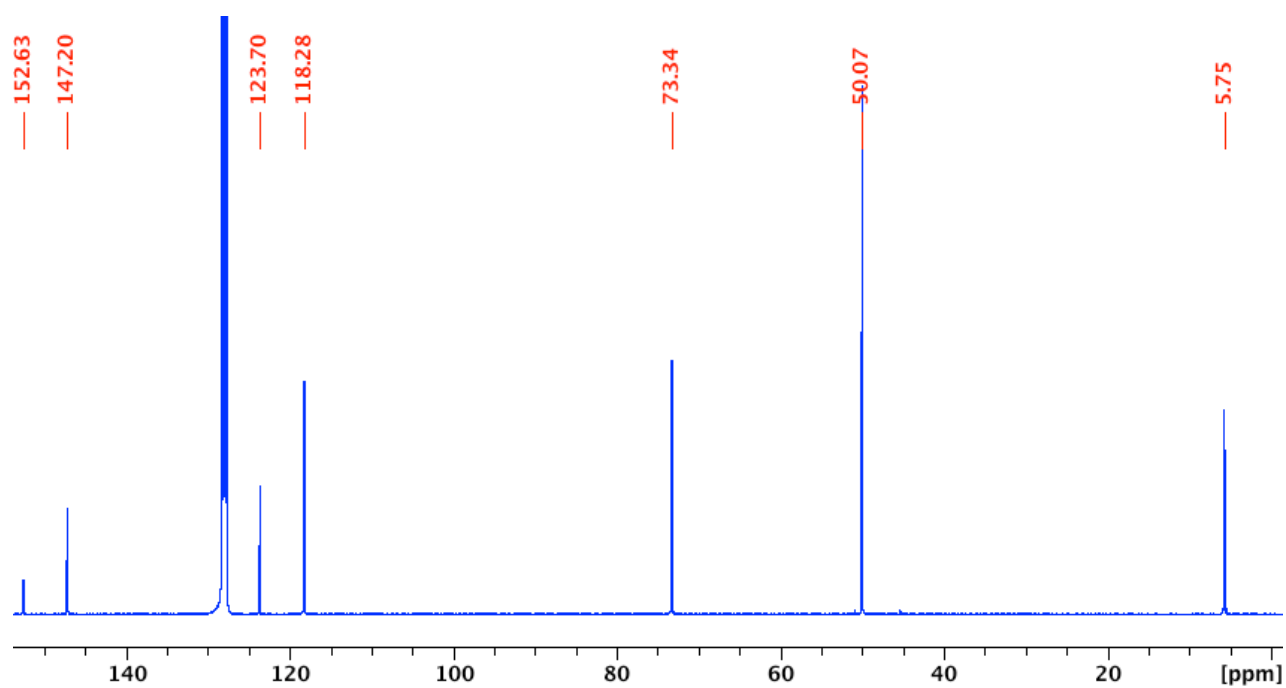

**Figure S14.**  $^{13}\text{C}$  NMR  $\text{C}_6\text{D}_6$ ,  $\delta$  152.63 (1C, s, C<sub>1</sub>),  $\delta$  147.20 (2C, s, C<sub>2</sub>),  $\delta$  123.70 (1C, s C<sub>4</sub>),  $\delta$  118.28 (2C, s, C<sub>3</sub>),  $\delta$  73.34 (2C, s, C<sub>5</sub>),  $\delta$  50.07 (4C, s, C<sub>6</sub>),  $\delta$  5.75 (3C, s, C<sub>7</sub>)

## XRD data.

The crystallographic data for all structures were collected a Bruker Venture Metaljet (Ga radiation) via the Bruker APEX III <sup>1</sup> software packages. Cell refinement and data reduction were performed using SAINT.<sup>2</sup> An empirical absorption correction, based on multiple measurements of equivalent reflections, was applied using the program SADABS or TWINABS.<sup>3</sup> Space group was confirmed by the XPREP<sup>4</sup> APEX routine. The structure solved in OLEX<sup>5</sup> using the SHELX<sup>6</sup> suite and refined by full-matrix least squares with SHEXL.<sup>7</sup> Non-hydrogen atoms were refined with S2 anisotropic displacement parameters, whereas hydrogen atoms were set in calculated positions and refined via the riding model, with thermal parameters being 1.5 times that of the carbon bearing the H in question. All Thermal ellipsoid plots were drawn using OLEX.

**Table S1.** Crystal Data Collection and Refinement Parameters for Complex (NCN)Ni(OSiMe<sub>3</sub>)

|                                              |                                                      |                                                   |                                                                  |
|----------------------------------------------|------------------------------------------------------|---------------------------------------------------|------------------------------------------------------------------|
| <b>Empirical formula</b>                     | C <sub>15</sub> H <sub>28</sub> N <sub>2</sub> NiOSi | <b>Crystal size/mm<sup>3</sup></b>                | 0.24 × 0.2 × 0.12                                                |
| <b>Formula weight</b>                        | 339.19                                               | <b>2θ range for data collection/°</b>             | 7.536 to 134.264                                                 |
| <b>T (K)</b>                                 | 100                                                  | <b>Index ranges</b>                               | -15 ≤ h ≤ 16,<br>-19 ≤ k ≤ 19,<br>-16 ≤ l ≤ 16                   |
| <b>Rad. wavelength (Å)</b>                   | GaKα (λ = 1.34139)                                   | <b>Reflections collected</b>                      | 21692                                                            |
| <b>Crystal system</b>                        | monoclinic                                           | <b>Independent reflections</b>                    | 3926 [R <sub>int</sub> = 0.0459,<br>R <sub>sigma</sub> = 0.0326] |
| <b>space group</b>                           | Cc                                                   | <b>Data/restraints/parameters</b>                 | 3926/2/191                                                       |
| <b>a (Å)</b>                                 | 12.3810(7)                                           | <b>Goodness-of-fit on F<sup>2</sup></b>           | 1.063                                                            |
| <b>b (Å)</b>                                 | 13.9962(8)                                           | <b>Final R indexes [I &gt;= 2σ(I)]</b>            | R <sub>1</sub> = 0.0343, wR <sub>2</sub> = 0.0865                |
| <b>c (Å)</b>                                 | 11.9361(7)                                           | <b>Final R indexes [all data]</b>                 | R <sub>1</sub> = 0.0348, wR <sub>2</sub> = 0.0875                |
| <b>α (deg)</b>                               | 90                                                   | <b>Largest diff. peak/hole / e Å<sup>-3</sup></b> | 0.47/-0.30                                                       |
| <b>β (deg)</b>                               | 121.2275(19)                                         |                                                   |                                                                  |
| <b>γ (deg)</b>                               | 90                                                   |                                                   |                                                                  |
| <b>Z</b>                                     | 4                                                    |                                                   |                                                                  |
| <b>V (Å<sup>3</sup>)</b>                     | 1768.69(18)                                          |                                                   |                                                                  |
| <b>ρ<sub>calcd</sub> (g cm<sup>-3</sup>)</b> | 1.274                                                |                                                   |                                                                  |
| <b>μ (mm<sup>-1</sup>)</b>                   | 6.394                                                |                                                   |                                                                  |
| <b>θ range (deg)</b>                         | 3.768 – 67.132                                       |                                                   |                                                                  |
| <b>wR2<sup>b</sup> [I &gt; 2σ(I)]</b>        | 0.1633                                               |                                                   |                                                                  |

$$^a R_1 = \frac{\sum (|F_o| - |F_c|)}{\sum F_o}$$

$$^b wR_2 = \left\{ \frac{\sum [w(F_o^2 - F_c^2)]^2}{\sum [w(F_o^2)]^2} \right\}^{1/2}$$



## Footnotes

<sup>1</sup> Bruker (2012). APEX2 / Bruker (2016) APEX3, Bruker AXS Inc., Madison, WI, USA.

<sup>2</sup> Bruker (2012). "SAINT Integration Software for Single Crystal Data", Bruker AXS Inc., Madison, WI, USA.

<sup>3</sup> (a) Sheldrick, G. M. (1996). SADABS/TWINABS. University of Göttingen, Germany. (b) Bruker (2001). SADABS/TWINABS. Bruker AXS Inc., Madison, Wisconsin, USA.

<sup>4</sup> Bruker (2012). Data Preparation and Reciprocal Space Exploration Program, Bruker AXS Inc., Madison, WI, USA.

<sup>5</sup> A: O. V. Dolomanov, L. J. Bourhis, R. J. Gildea, J. A. K. Howard and H. Puschmann. "OLEX2: a complete structure solution, refinement and analysis program". *J. Appl. Cryst.* 2009, 42, 339-341.

<sup>6</sup> Sheldrick, G. M., "SHELXT - Integrated space-group and crystal structure determination", *Acta Cryst.*, 2015, A71, 3-8.

<sup>7</sup> Sheldrick, G. M., Crystal structure refinement with SHELXL, *Acta Cryst.*, 2015, C71, 3-8
